# Supplementary material
Source: PubMed Central journal article supplement (PMC138613)
Supplement: pnas_252427999_5.pdf [file pnas_252427999_5.pdf]

**Table 1. Microinjection experiments reveal specific movement of CmHsc70-1 and CmHsc70-2 but not of CmHsc70-3**

| Injected material *                            | Injections | Movement (%)         | Expression system and purification scheme                                           |
|------------------------------------------------|------------|----------------------|-------------------------------------------------------------------------------------|
| LYCH                                           | 28         | 28 (100)             | NA                                                                                  |
| 12 kDa F-dextran                               | 37         | 2 (5)                | NA                                                                                  |
| CmPP16 †                                       | 16         | 14 (87)              | <i>Escherichia coli</i> and recombinant protein purified from inclusion bodies (IB) |
| CmHsc70-1                                      | 18         | 15 (82)              | Baculovirus/ <i>Escherichia coli</i> – native /IB purified                          |
| CmHsc70-2                                      | 10         | 7 (70)               | <i>Escherichia coli</i> – native and IB purified                                    |
| CmHsc70-3                                      | 27         | 1 (4)                | Baculovirus/ <i>Escherichia coli</i> – native /IB purified                          |
| CmHsc70-1 377-652                              | 10         | 0 (0)                | <i>Escherichia coli</i> – native /IB purified                                       |
| CmHsc70-1 1-376                                | 25         | 22 (88)              | <i>Escherichia coli</i> – native /IB purified                                       |
| CmHsc70-3–Hsc70-1 466-652                      | 12         | 11 (92)              | <i>Escherichia coli</i> – native /IB purified                                       |
| CmHsc70-1 622-639                              | 10         | 1 (10)               | <i>Escherichia coli</i> – native /IB purified                                       |
| CmHsc70-1 N P <sub>637</sub> >T                | 10         | 0 (0)                | <i>Escherichia coli</i> – native /IB purified                                       |
| CmHsc70-3 T <sub>634</sub> >P                  | 31         | 20 (65) <sup>‡</sup> | <i>Escherichia coli</i> – native /IB purified                                       |
| hHsp70                                         | 10         | 0 (0)                | <i>Escherichia coli</i> – native /IB purified                                       |
| hHsp70 -CmHsc70-1 SVR-TPR-PB                   | 15         | 12 (80) <sup>‡</sup> | <i>Escherichia coli</i> – native /IB purified                                       |
| GFP-CmHsp70-1 SVR-TPR-PB (625-652)             | 16         | 3 (19)               | <i>Escherichia coli</i> – native purified                                           |
| GFP-CmHsp70-1 SVR-TPR-PB (P <sub>637</sub> >T) | 10         | 2 (20)               | <i>Escherichia coli</i> – native purified                                           |

\* All protein probes except GFP constructs were coinjected with 12 kDa F-dextran to monitor the increase in plasmodesmal size exclusion limit and as an efficient reporter of protein trafficking from cell to cell.

† Concentration of proteins used in microinjection assays was 0.5 µg/µl.

‡ Movement occurred into 7 cells and the rate of spread was much slower than with CmPP16.
