# Supplementary material
Source: PubMed Central journal article supplement (PMC138613)

**A**

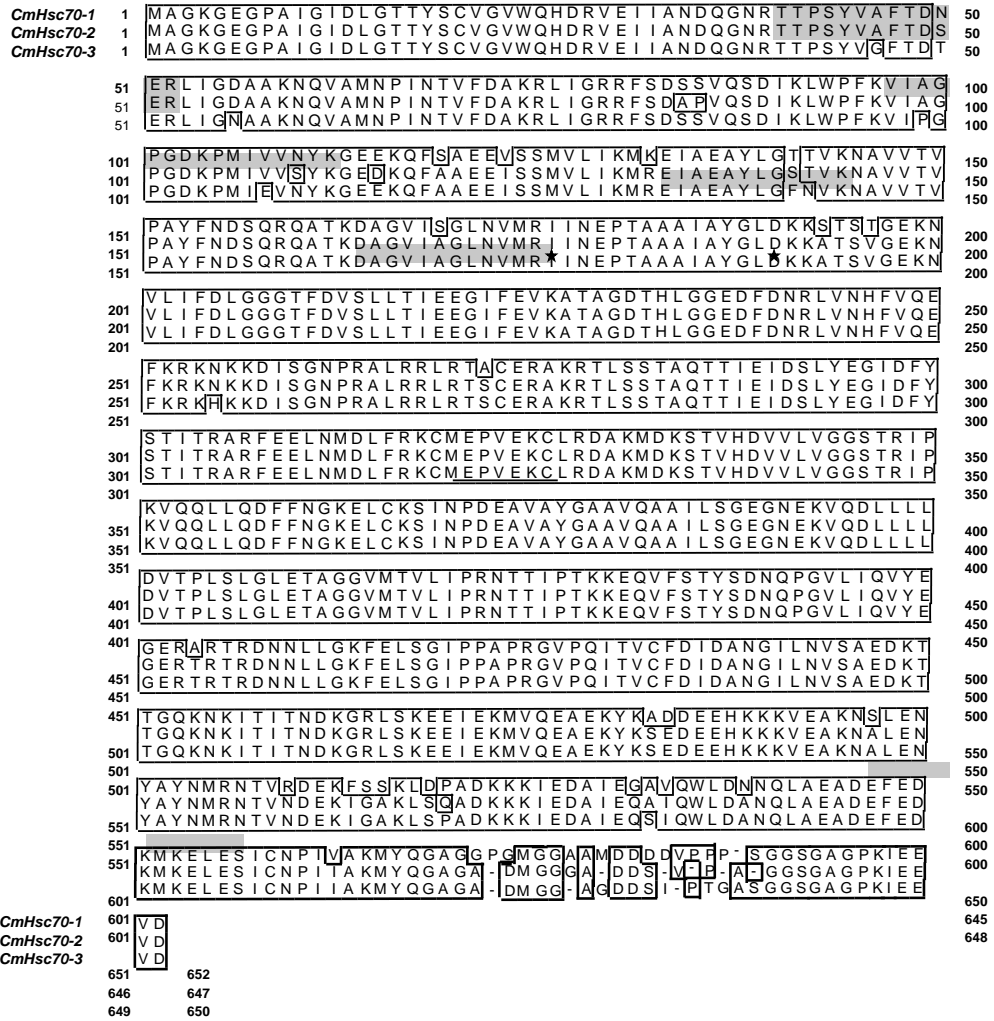

**B**

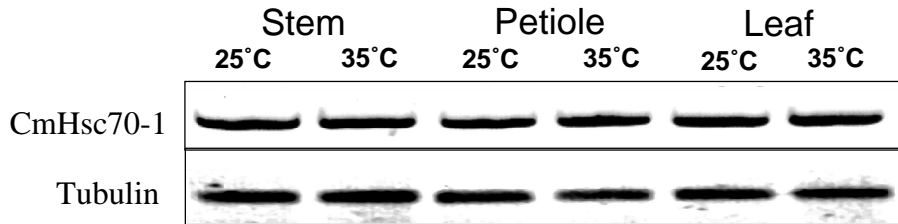

Supplement: pnas_252427999_2.pdf [file pnas_252427999_2.pdf]

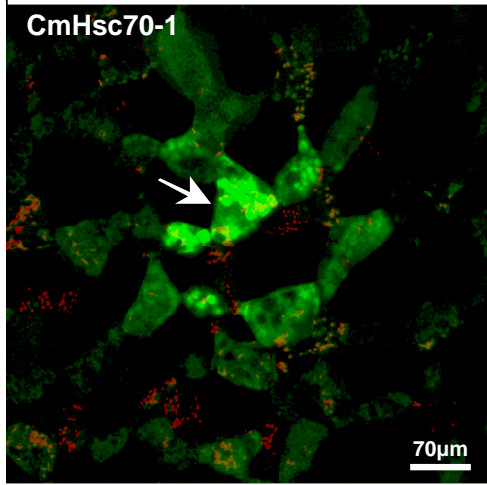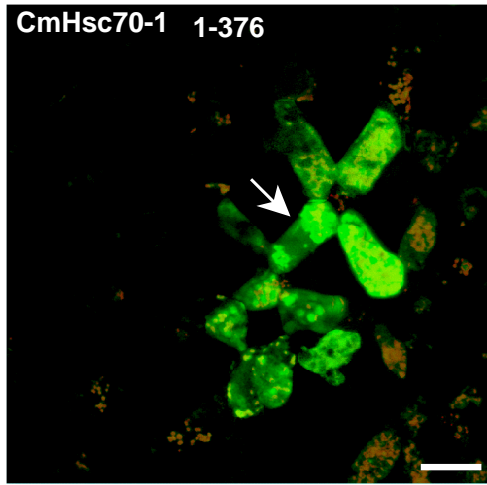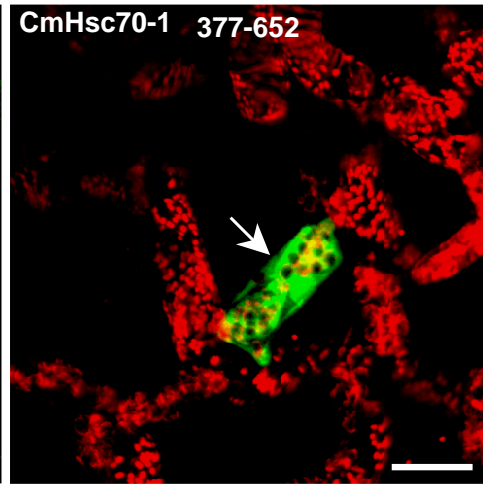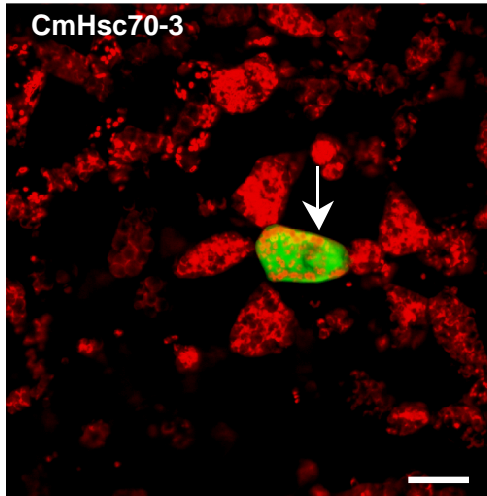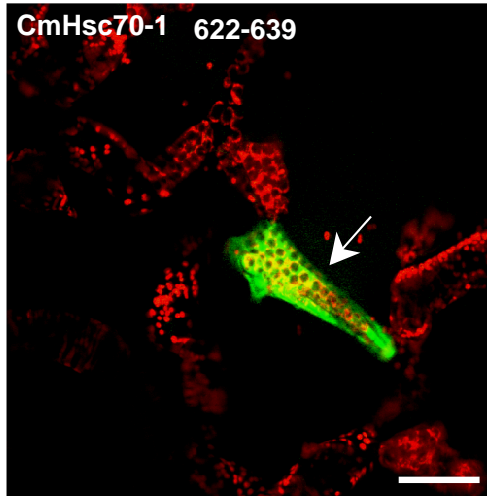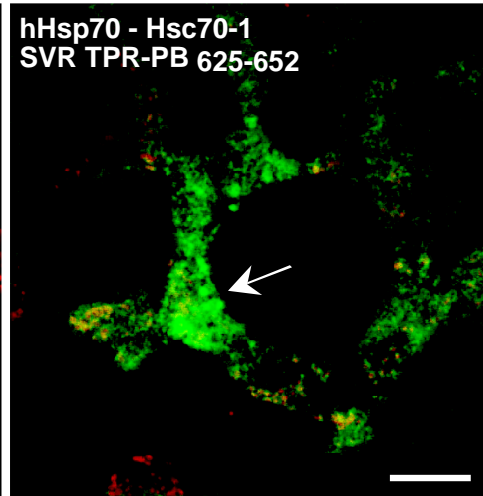

Supplement: pnas_252427999_4.pdf [file pnas_252427999_4.pdf]
